# Supplementary material for: Targeting p300 and CBP abolishes HOXB13-loss-induced lipogenesis and tumor metastasis
Source: JCI journal article supplement (doi:10.1172/jci.insight.195743), 2025-11-23
Supplement: sd1 [file 1]

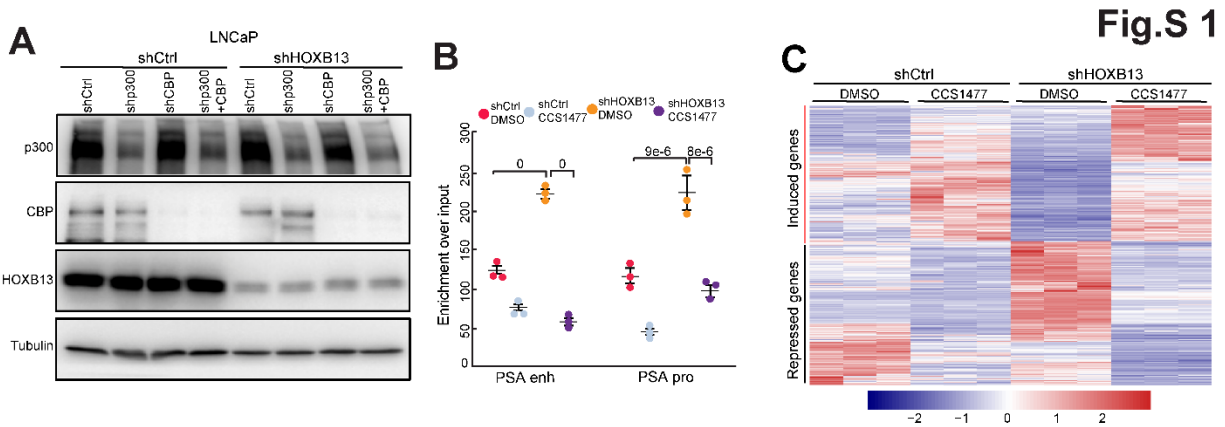

**Figure S1. p300/CBP are required for HOXB13 loss-induced lipogenic program**

**A.** WB analysis of p300, CBP, and HOXB13 knockdown (KD) efficiency in LNCaP cells with indicated treatment.

**B.** H3K27ac ChIP-QPCR of PSA enhancer (enh) and promoter (pro) in LNCaP cells with *HOXB13* KD and/or CCS1477 treatment. Data were normalized to 2% of input DNA. Shown are mean  $\pm$ sem of technical replicates from one representative experiment of three. Statistical significance was determined by one-way ANOVA followed by Tukey's multiple comparisons test.

**C.** Heatmap showing CCS1477-induced and -repressed genes in control or *HOXB13*-KD LNCaP cells. CCS1477-regulated genes were identified by DESeq2 with  $FC \geq 1.5$ , adjusted  $p < 0.05$ . Color bar: z-score.

**Fig.S2**

**A**

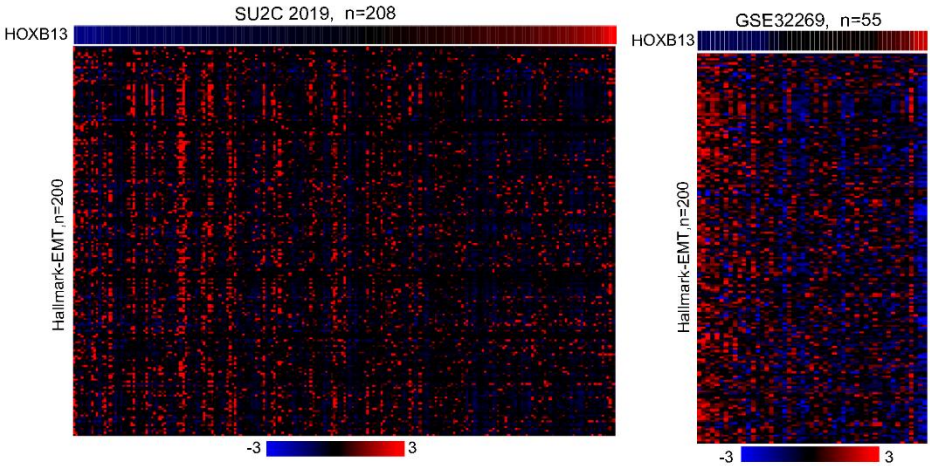

**B**

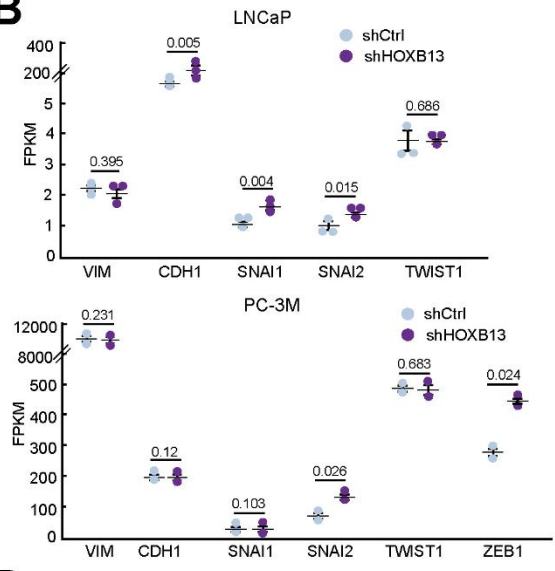

**C**

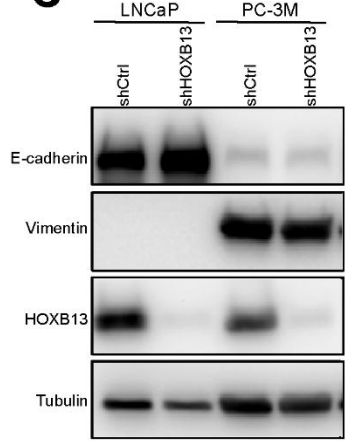

**D**

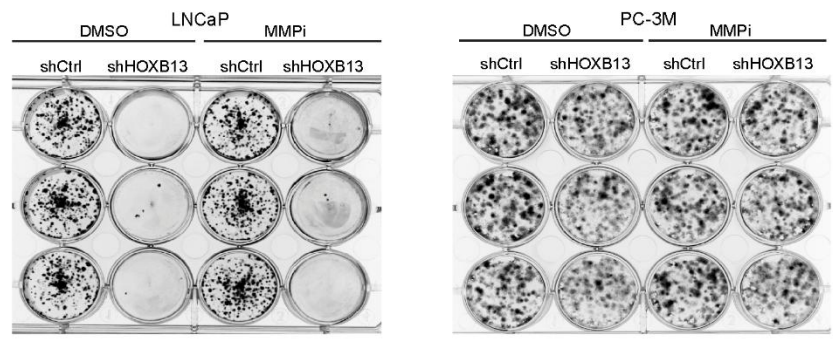

**E**

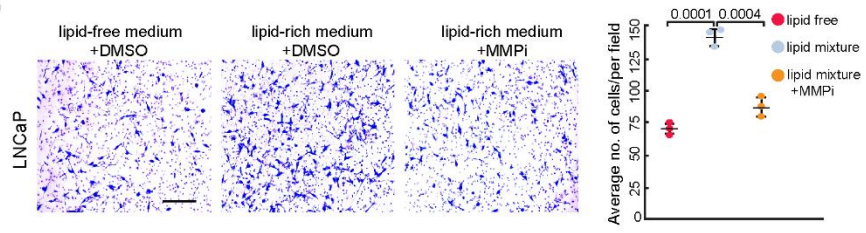

**Figure S2. Matrix metalloproteinases (MMPs) are induced upon HOXB13 loss to increase cell motility**

**A.** Heatmap showing HALLMARK\_EPITHELIAL\_MESENCHYMAL\_TRANSITION (Hallmark-EMT) signature genes in the indicated PCa patient data sets with samples ordered by HOXB13 level (top row). The Hallmark-EMT signatures were downloaded from MSigDB.

Color bar: z-score.

**B.** RNA-seq analysis of EMT regulators and markers (CDH1 and VIM) in LNCaP (top) and PC-3M (bottom) cells with control or *HOXB13* KD.

**C.** WB analysis of EMT markers (CDH1 and VIM) in LNCaP and PC-3M cells with control or *HOXB13* KD.

**D.** Colony formation assays of LNCaP (left) and PC-3M (right) cells with sh*HOXB13* and/or MMPi treatment.

**E.** Cell invasion assays of LNCaP cells cultured in lipid-free medium, lipid-rich medium (2% lipid mixture) or lipid-rich medium (2% lipid mixture) plus MMP inhibitor (MMPi).

Representative images are shown (left), and the number of invaded cells is quantified (right).

Scale bar, 50  $\mu$ m. Statistical significance was determined by one-way ANOVA followed by Tukey's multiple comparisons test.

**Fig.S3**

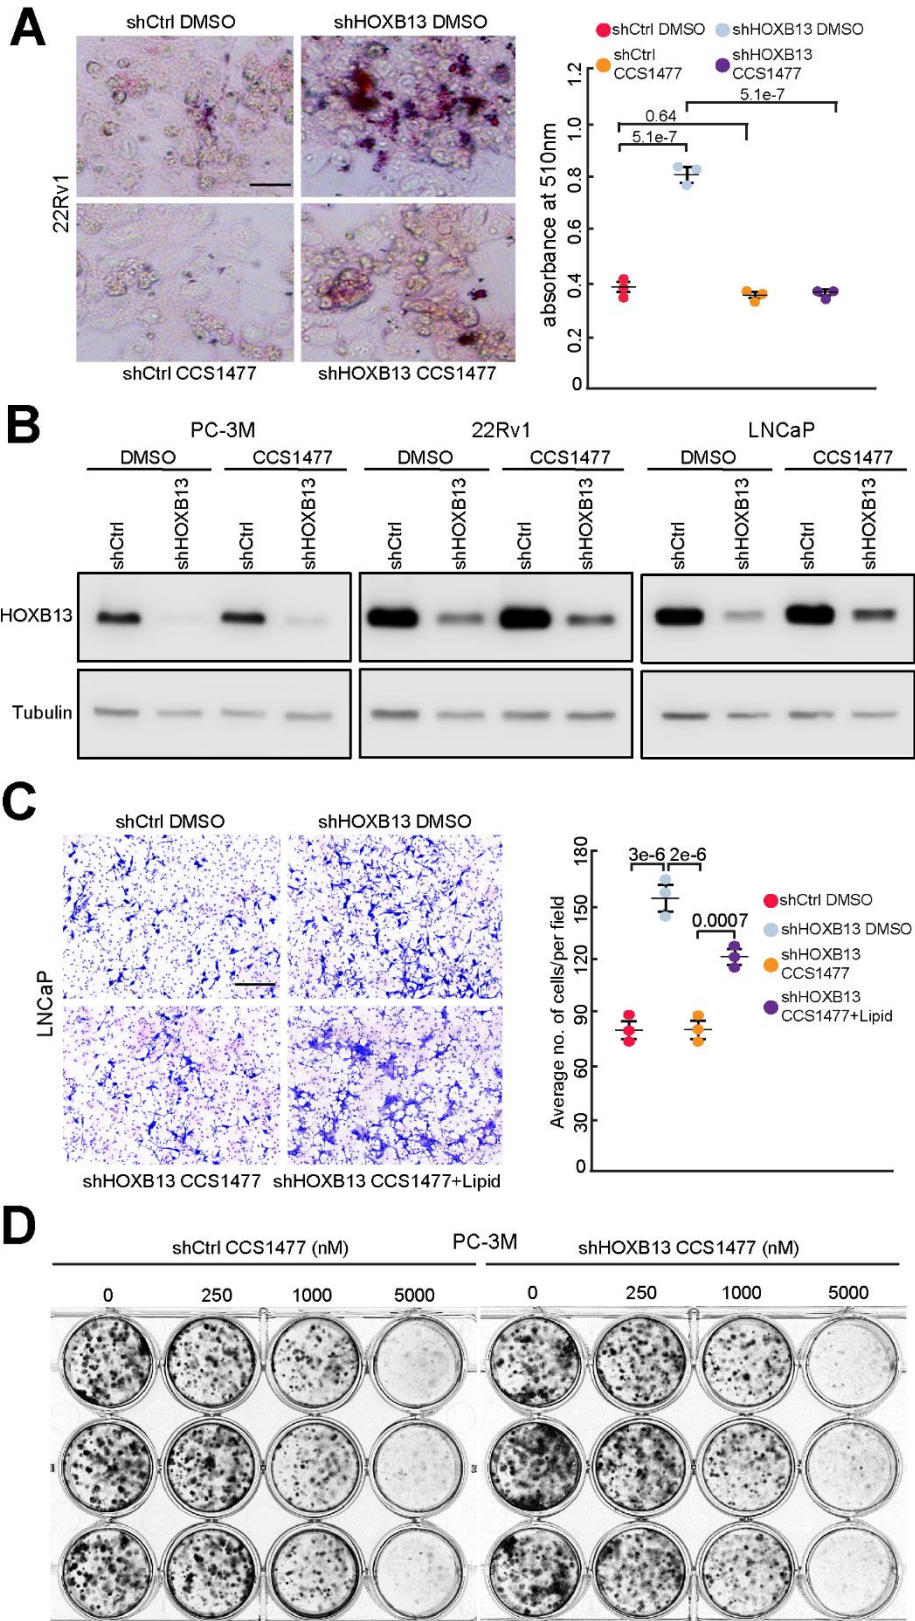

**Figure S3. p300/CBP inhibitors mitigate *HOXB13*-KD-induced lipid accumulation and cell invasion**

**A.** Representative images of ORO staining (left) and quantification (right) of neutral lipids in 22Rv1 cells with sh*HOXB13* and/or CCS1477 treatment. Scale bar, 30  $\mu$ m. Quantification data are the mean  $\pm$  s.d. of technical replicates from one of two (n = 2) independent experiments. Statistical significance was determined by one-way ANOVA followed by Tukey's multiple comparisons test.

**B.** WB analysis of *HOXB13* KD efficiency in LNCaP, 22Rv1 and PC-3M cells.

**C.** Cell invasion assays of control or *HOXB13*-KD LNCaP cells treated with DMSO or CCS1477 or CCS1477 plus lipid mixture. Representative images are shown (left), and the number of invaded cells is quantified (right). Scale bar, 50  $\mu$ m. Statistical significance was determined by one-way ANOVA followed by Tukey's multiple comparisons test.

**D.** Colony formation assays of control (shCtrl) or *HOXB13*-KD (sh*HOXB13*) PC-3M cells treated with indicated concentration of CCS1477.

**Fig.S4**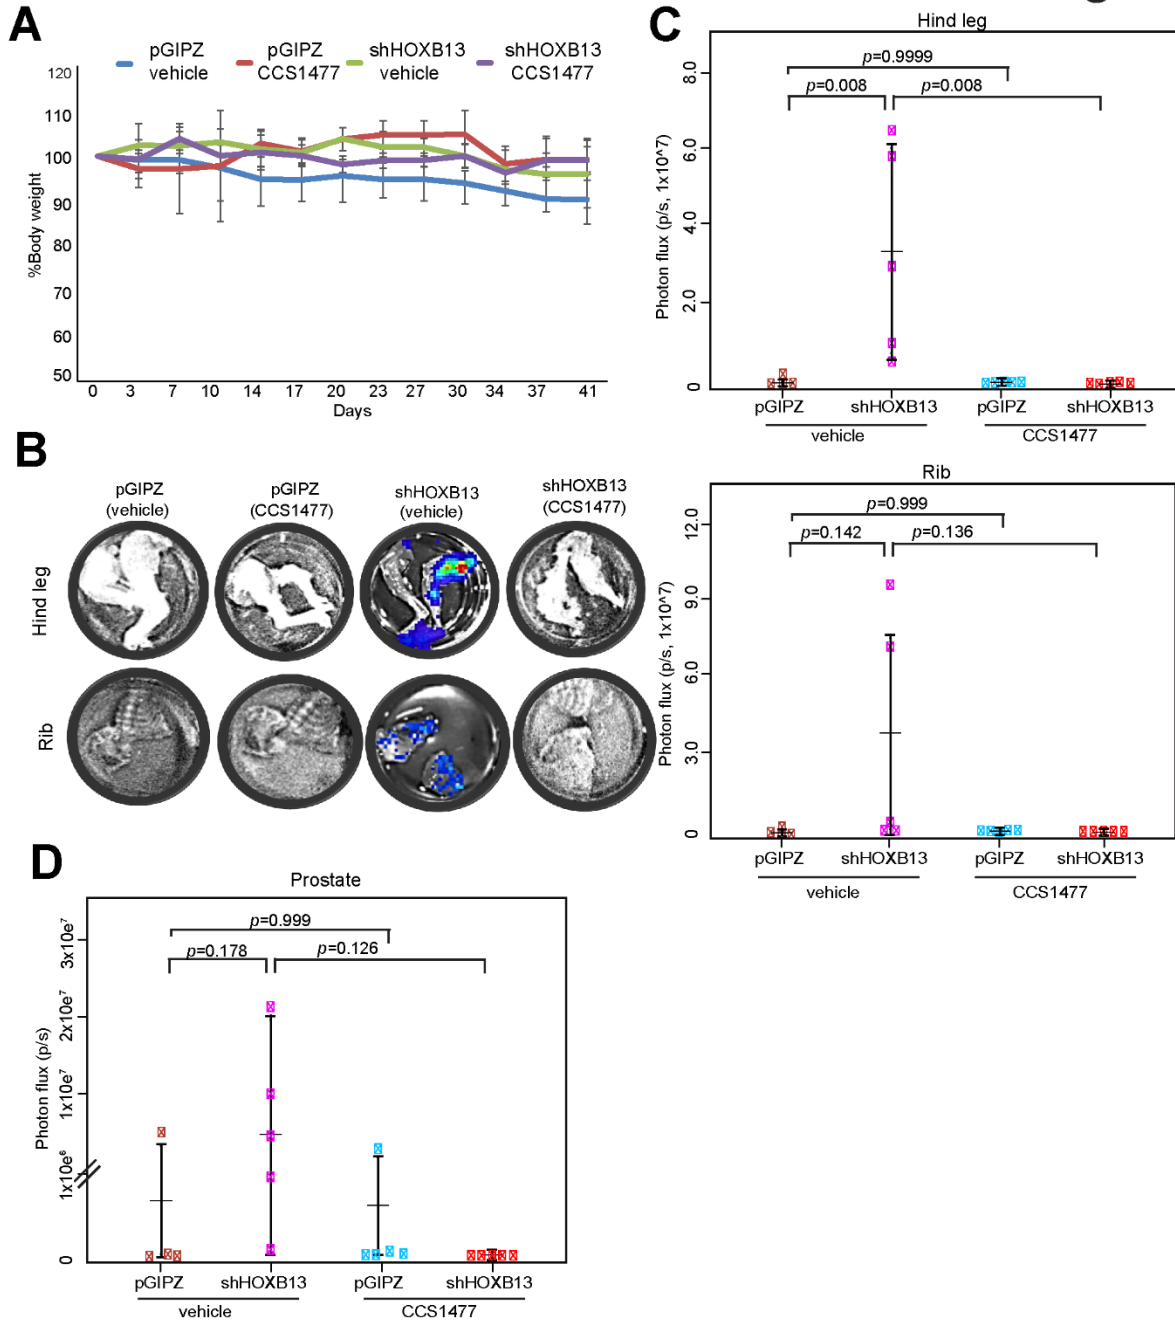**Figure S4. Therapeutic targeting of HOXB13-low tumors with p300/CBP inhibitor**

**A.** Body weight analysis in mice inoculated by control or *HOXB13*-KD PC-3M cells and treated with vehicle or CCS1477. Data in each time point are mean  $\pm$  s.d. Y-axis shows the percentage of body weight change.

**B-D.** Representative *ex vivo* IVIS images (**B**) and quantifications (**C-D**) of PC-3M tumor metastasis to the hind leg, rib and prostate. Heatmap shows IVIS signal intensity color scale.

Statistical significance was determined by one-way ANOVA followed by Tukey's multiple comparisons test.

## Supplemental methods

### FPKM ( fragments per kilobase of transcript per million mapped reads ) calculation with in-house Perl script

```
my @files = <*ReadsPerGene.out.tab>;

$inputname1 = 'igenome_gene_name_length.txt';
$inputname2 = 'sample_read_mapping.txt';

my %gene_hash;
my %mapping_hash;
my $mreads;

open(INPUTFILE1, $inputname1);
while($dateline1 = <INPUTFILE1>)
{
    chomp($dateline1);
    my @line1 = split("\t", $dateline1);
    #gid is actually gene_name, since it is unique, lazy to change code, gene_name used twice
    my $gid = $line1[0];
    my $genenamelen = "$line1[0]\t$line1[1]";
    $gene_hash{$gid} = $genenamelen;
}
close(INPUTFILE1);

open(INPUTFILE2, $inputname2);
while($dateline2 = <INPUTFILE2>)
{
    chomp($dateline2);
    my @line2 = split("\t", $dateline2);
    my $filename = $line2[0];
    my $mappedreads = $line2[2];
    $mapping_hash{$filename} = $mappedreads;
}
close(INPUTFILE2);

foreach $file (@files)
{
    $fname = substr $file, 0, index($file, 'ReadsPerGene');
    if(exists($mapping_hash{$fname}))
    {
        $mreads = $mapping_hash{$fname};
    }
}
```

```

}

open(OUTPUTFILE, '>', $fname.'_FPKM.txt');
open(INPUTFILE, $file);

while($datline = <INPUTFILE>)
{
    next if 1..4;
    chomp($datline);
    my @line = split("\t", $datline);
    my $rgid = $line[0];
    my $rawcounts = $line[1];
    if(exists($gene_hash{$rgid}))
    {
        @gene = split("\t", $gene_hash{$rgid});
        $genename = $gene[0];
        $genelength = $gene[1];
        my $FPKM = sprintf "%.7f", ($rawcounts * 1000000000)/($mreads *
$genelength);
        print OUTPUTFILE "$rgid\t$FPKM\n";
    }
    else
    {
        print OUTPUTFILE "$rgid\t\n";
    }
}
close(INPUTFILE);
close(OUTPUTFILE);
}

```

## Supplemental tables

### Supplemental table 1. 45 genes involved in the fatty-acyl-CoA biosynthetic process and long-chain fatty-acyl-CoA biosynthetic process are enriched in region IV

| Gene name | Gene/product name                           |
|-----------|---------------------------------------------|
| ACAT1     | Acetyl-CoA acetyltransferase, mitochondrial |
| ELOVL7    | Very long chain fatty acid elongase 7       |
| ACSL6     | Long-chain-fatty-acid--CoA ligase 6         |
| SLC27A2   | Long-chain fatty acid transport protein 2   |
| GCDH      | Glutaryl-CoA dehydrogenase, mitochondrial   |
| ELOVL1    | Very long chain fatty acid elongase 1       |
| ACSL4     | Long-chain-fatty-acid--CoA ligase 4         |
| ACSF3     | Malonate--CoA ligase ACSF3, mitochondrial   |

|          |                                                                                                          |
|----------|----------------------------------------------------------------------------------------------------------|
| CBR4     | 3-oxoacyl-[acyl-carrier-protein] reductase                                                               |
| ELOVL5   | Very long chain fatty acid elongase 5                                                                    |
| TECR     | Very-long-chain enoyl-CoA reductase                                                                      |
| ACACA    | Acetyl-CoA carboxylase 1                                                                                 |
| HACD1    | Very-long-chain (3R)-3-hydroxyacyl-CoA dehydratase 1                                                     |
| ELOVL2   | Very long chain fatty acid elongase 2                                                                    |
| ELOVL4   | Very long chain fatty acid elongase 4                                                                    |
| ACSL5    | Long-chain-fatty-acid--CoA ligase 5                                                                      |
| ACSL3    | Fatty acid CoA ligase Acsl3                                                                              |
| PPT1     | Palmitoyl-protein thioesterase 1                                                                         |
| HTD2     | Hydroxyacyl-thioester dehydratase type 2, mitochondrial                                                  |
| ACSBG1   | Long-chain-fatty-acid--CoA ligase ACSBG1                                                                 |
| HACD2    | Very-long-chain (3R)-3-hydroxyacyl-CoA dehydratase 2                                                     |
| PPT2     | Lysosomal thioesterase PPT2                                                                              |
| ACSBG2   | Long-chain-fatty-acid--CoA ligase ACSBG2                                                                 |
| FASN     | Fatty acid synthase                                                                                      |
| ELOVL6   | Very long chain fatty acid elongase 6                                                                    |
| HSD17B12 | Very-long-chain 3-oxoacyl-CoA reductase                                                                  |
| ACSL1    | Long-chain-fatty-acid--CoA ligase 1                                                                      |
| ELOVL3   | Very long chain fatty acid elongase 3                                                                    |
| PDHA2    | Pyruvate dehydrogenase E1 component subunit alpha, testis-specific form, mitochondrial                   |
| ACLY     | ATP-citrate synthase                                                                                     |
| ACSS2    | Acetyl-coenzyme A synthetase, cytoplasmic                                                                |
| ACSS1    | Acetyl-coenzyme A synthetase 2-like, mitochondrial                                                       |
| MLYCD    | Malonyl-CoA decarboxylase, mitochondrial                                                                 |
| DLAT     | Dihydrolipoyllysine-residue acetyltransferase component of pyruvate dehydrogenase complex, mitochondrial |
| PDHA1    | Pyruvate dehydrogenase E1 component subunit alpha, somatic form, mitochondrial                           |
| ZNF516   | Zinc finger protein 516                                                                                  |
| RORC     | Nuclear receptor ROR-gamma                                                                               |
| ABHD15   | Protein ABHD15                                                                                           |
| SPTLC2   | Serine palmitoyltransferase 2                                                                            |
| PGRMC2   | Membrane-associated progesterone receptor component 2                                                    |
| VPS13B   | Intermembrane lipid transfer protein VPS13B                                                              |
| XBP1     | X-box-binding protein 1                                                                                  |
| DYRK1B   | Dual specificity tyrosine-phosphorylation-regulated kinase 1B                                            |
| SOX8     | Transcription factor SOX-8                                                                               |
| SH3PXD2B | SH3 and PX domain-containing protein 2B                                                                  |

**Supplemental table 2. Oligonucleotides that were used in this study**

| Primers: |                           |             |
|----------|---------------------------|-------------|
| Name     | Sequence (5' to 3')       | Application |
| MMP7-F   | GGAGGCATGAGTGAGCTACAG     | RT-PCR      |
| MMP7-R   | GGCCAAAGAATTTTTGCATC      | RT-PCR      |
| MMP10-F  | CACAGTTTGGCTCATGCCTA      | RT-PCR      |
| MMP10-R  | AAGTTCATGAGCAGCAACGA      | RT-PCR      |
| MMP12-F  | CTAGTGATCCAAAGGCCGTAAT    | RT-PCR      |
| MMP12-R  | CACGGTAGTGACAGCATCAA      | RT-PCR      |
| MMP13-F  | GGTTCCTGATGTGGGTGAAT      | RT-PCR      |
| MMP13-R  | TGAATGCCTTTTCGACTTCA      | RT-PCR      |
| KLK3-AF  | GCCTGGATCTGAGAGAGATATCATC | ChIP-PCR    |
| KLK3-AR  | ACACCTTTTTTTTTCTGGATTGTTG | ChIP-PCR    |
| FASN-AF  | CAGAAGAGTAAACGCAGGAGAA    | ChIP-PCR    |
| FASN-AR  | CCTCACTTTAGGACCAGGAAAC    | ChIP-PCR    |
| shRNAs:  |                           |             |
| Name     | Sequence (5' to 3')       |             |
| shp300   | AAGCTACTGAAGATAGATTAATA   |             |
| shCBP    | GCAAGACATCCCGAGTCTATA     |             |
